# Supplementary material for: Polynorepinephrine nanoparticles activate vascular smooth muscle alpha-1 adrenergic receptors
Source: Royal Society of Chemistry journal article supplement (doi:10.1039/d4na00481g), 2024-11-18
Supplement: d4na00481g1.pdf [file d4na00481g1.pdf]

1  
2  
3  
4  
5  
6  
7  
8  
9  
10  
11  
12  
13  
14  
15  
16  
17  
18  
19  
20  
21  
22  
23  
24  
25  
26  
27

## Supplementary information

### Polynorepinephrine nanoparticles activate vascular smooth muscle alpha-1 adrenergic receptors

Vinayaraj Ozhukil Kollath<sup>1 ‡</sup>, Vivek Krishna Pulakazhi Venu<sup>2 ‡</sup>, Mahmoud Saifeddine<sup>2</sup>,  
Koichiro Mihara<sup>2</sup>, Simon A. Hirota<sup>2</sup>, Morley D. Hollenberg<sup>2,3 \*</sup>, Kunal Karan<sup>1 \*</sup>

<sup>1</sup>*Department of Chemical and Petroleum Engineering, University of Calgary, Calgary, AB, Canada*

<sup>2</sup>*Department of Physiology & Pharmacology, Inflammation Research Network-Snyder Institute for  
Chronic Disease, University of Calgary Cumming School of Medicine, Calgary, AB, Canada*

<sup>3</sup>*Department of medicine, Inflammation Research Network-Snyder Institute for Chronic Disease,  
University of Calgary Cumming School of Medicine, Calgary, AB, Canada*

‡ - Authors made equal contribution

\*Corresponding Authors

Prof. Kunal Karan

Department of Chemical and Petroleum Engineering,  
University of Calgary, Calgary, AB, Canada

Email: [kkaran@ucalgary.ca](mailto:kkaran@ucalgary.ca)

and

Prof. Morley D. Hollenberg

Department of Physiology & Pharmacology, Inflammation Research Network-  
Snyder Institute for Chronic Disease, University of Calgary Cumming School of  
Medicine, Calgary, AB, Canada

Email: [mhollenb@ucalgary.ca](mailto:mhollenb@ucalgary.ca)

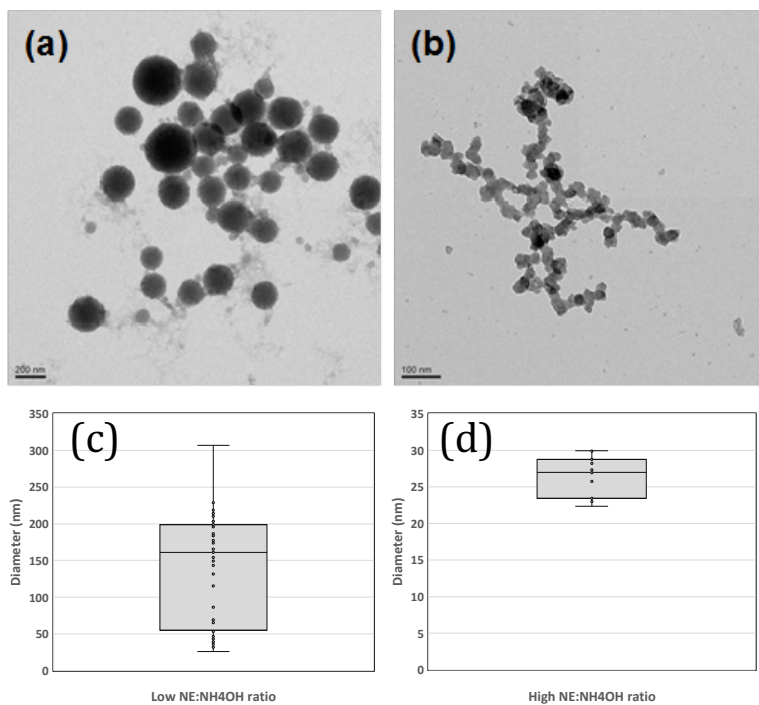

29  
30  
31  
32  
33  
34  
35  
36  
37  
38  
39  
40  
41  
42  
43  
44  
45  
46

**Figure S1:** (a, b) Transmission electron micrographs showing aggregation and morphology of PNE NPs; (c) and (d) box plot of particle size of PNE-NPs visualized from TEM image (a) and (b) with ncount of 49 and 14, respectively.

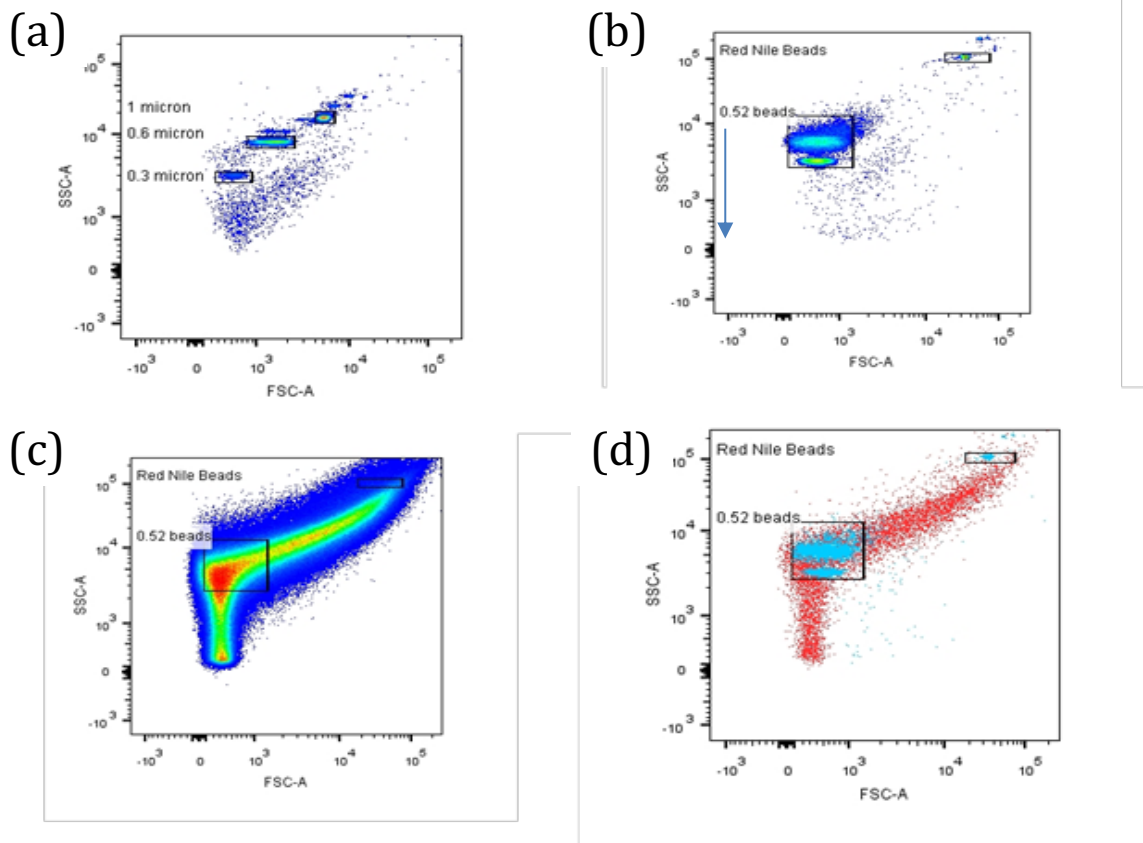

47  
 48 **Figure S2:** Flow cytometry results are shown in (a-d). (a) NFPPS-52-4k standard  
 49 beads, (b) Red Nile beads and 0.52  $\mu\text{m}$  microbeads (c) PNE-NPs and (d) shows overlapping of  
 50 PNE-NP with the 3 standards.  
 51  
 52  
 53  
 54  
 55

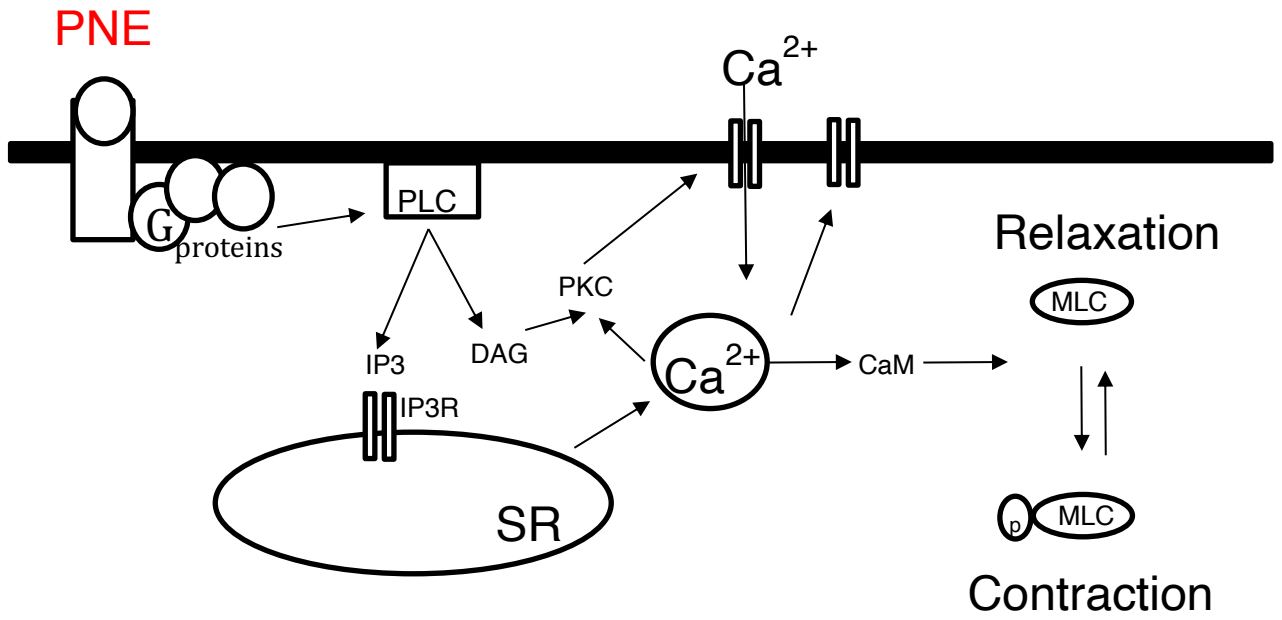

56  
57  
58  
59

**Figure S3:** Schematic representation of Ca<sup>2+</sup> assay and proposed mechanism of PNE-NP function.

## 60 **Materials & Methods**

61 Norepinephrine hydrochloride, Prazosin hydrochloride (Sigma-Aldrich, MO, USA), anhydrous ethanol  
62 (Commercial Alcohols, ON, Canada), MAPK inhibitor (LY294002 hydrochloride, Tocris,  
63 Bristol, UK) and Ammonium hydroxide (50 % v/v aqueous solution, Alfa Aesar, MA, USA)  
64 were used without further purification. For all syntheses, high purity deionized water (DI  
65 water; 18 M $\Omega$ , Milli-Q Advantage A10, Millipore SAS, France) was used.  
66

67 *Synthesis of PNE NPs:* The NP synthesis was adapted from our previously reported method.<sup>[1]</sup> In a  
68 typical batch preparation of nanoparticles, 53 mg Norepinephrine hydrochloride was added  
69 to a total volume of 15 ml mixture of 33.3 % v/v of absolute ethanol, 63.3 % v/v DI water and  
70 3.3 % v/v NH<sub>4</sub>OH aqueous solution (3.4 M) and stirred for 2 h at room temperature (RT). A  
71 color change from clear to brown indicated the oxidative polymerization of norepinephrine to  
72 polynorepinephrine (PNE). The resulting suspension was then dialyzed extensively against  
73 distilled deionized water at room temperature using Spectra/Por dialysis membrane tubing  
74 (12-14 kD cutoff, S432706 Fisher Scientific) until the dialysate became neutral (pH, 7.4 $\pm$ 0.3).  
75 The dialyzed NP suspension was stored at RT and used without further processing.  
76 Concentration of NPs in the resulting suspension was quantified using flow cytometry as  
77 described below.  
78

79 *Physicochemical characterization of PNE nanoparticles:* The morphology of PNE nanoparticles (NPs)  
80 was characterized using scanning electron microscopy (SEM; XL30, FEI Corp.) and  
81 transmission electron microscopy (TEM; Tecnai F20, FEI Corp.). Particle size analysis of PNE  
82 NPs was conducted using ImageJ v1.46 software. Absorption and photo luminescence spectra  
83 of PNE NPs dispersed in ethanol were studied using a Varian CARY 300 Bio UV-Visible  
84 spectrophotometer and a Horiba Jobin Yvon Fluoromax-4 spectroscopy, respectively. The  
85 path length of the cuvette used was 10 mm in both cases. For a quantum yield (QY)  
86 calculation, integrated fluorescence intensities of PNE NPs dispersed in ethanol were plotted  
87 versus the respective absorbance values (all absorbance under 0.1 at 320 nm). Then, the  
88 slope of the curve was used to calculate the QY of PNE with reference to the known values of a  
89 quinine sulfate standard (both excited at 320 nm) as reported by Pan *et al.*<sup>[2]</sup> Laser scanning  
90 confocal microscopy (LSCM) was performed using a Leica SP8 X inverted confocal microscope  
91 equipped with a White Light Laser (470-670 nm). The excitation wavelength was increased  
92 from 470 nm at a 10 nm step size until 670 nm, while the detection range was set to 480 –  
93 750 nm. For imaging the PNE, NPs were first dispersed in ethanol and homogenized by 10  
94 min ultrasonication (Branson 2800 series, Branson Ultrasonics Corp., CT, USA). The  
95 homogenized dispersion was dropped on a glass coverslip, dried and placed under the  
96 microscope for imaging using a 63 $\times$  oil immersion objective.

97 *Flow Cytometry of the NPs* was carried out at a dilution of 1 in 10000 along with standard reference  
98 beads, in a BD FACSCanto 10 color (San Jose, USA) instrument. Carboxylate 0.52  $\mu$ m  
99 Polybead<sup>®</sup> microspheres (Cat #09836, Polysciences Inc., USA) and 2.49  $\mu$ m Nile red  
100 reference beads (BD, San Jose, USA) were used as reference standards. A drop of Nile red  
101 polybeads or a drop of both sets of beads were added to a polystyrene tube containing 0.2  
102 micron filtered Millipore water along with the diluted norepinephrine nanoparticle sample. In  
103 addition, a Nano Fluorescent Size Standard Kit (cat # NFPPS-52-4K, Yellow, Flow Cytometry  
104 Grade, Spherotech, Lake Forest, USA) was used as a quality control.  
105

106 *Tissue Isolation and wire-myography measurements of PNE-NP-increases in vascular tension:* All  
107 experiments were done using aorta tissues from 8-12 week old male wild-type C57BL/6 mice  
108 (N= 5 mice) (20 to 25 g). Bioassay protocols were approved by the University of Calgary  
109 Animal Care Committee and are described elsewhere.<sup>[3,4]</sup> Prior to euthanasia, animals were  
110 heparinized (100  $\mu$ l containing 1000 IU/ml of heparin administered intraperitoneally) and  
111 then euthanized 10 min later by isoflurane. Isometric tension studies using a Mulvany-  
112 Halpern myograph were performed essentially as described previously.<sup>[3]</sup> In brief, descending  
113 aorta tissue was cut into 2 mm long and 2 mm diameter rings and mounted in a wire-  
114 myograph (610 multimyograph system coupled to chart5 system software, AD instruments,

115 Colorado Springs, CO, USA). All assays were performed at 37 °C using isotonic Kreb's buffer,  
116 pH 7.4, aerated with 5 % CO<sub>2</sub> in air. Tissues were washed 4X after reaching an equilibrium  
117 tension in response to either the PNE-NPs or NE and were allowed to re-equilibrate in  
118 bioassay buffer for 20 minutes prior to the next addition of agonists to the organ bath. After  
119 validating the responsiveness of the tissues to KCl and PE-stimulated constriction and  
120 acetylcholine-mediated endothelium-dependent vasorelaxation, increasing amounts of the  
121 the PNE-NP preparation (1 µl to 1000 µl; Concentration =  $7.34 \times 10^6 \mu\text{l}^{-1}$ ) were added to the  
122 organ bath, and the resulting contractile responses were compared to those stimulated by  
123 increasing concentrations of NE. The recordings were analyzed using Lab Chart (ADI  
124 Instruments). To assess the action of receptor-selective alpha-1-adrenoceptor antagonists  
125 (Prazosin 1 µm, CGP21277A 300 µm, BMY7378 1 µm). All antagonists bought from Sigma  
126 Aldrich. Increasing concentrations of antagonist were added to the organ bath 20 minutes  
127 before the addition of a contractile concentration of either norepinephrine (1 µm) or PNE-  
128 NPs.

130 *Primary cultures of mouse aorta-derived vascular smooth muscle cells:* Isolation of vascular smooth  
131 muscle cells from mouse aorta was performed as described before.<sup>[5]</sup> Animals were  
132 euthanized as described in the above section and isolated aortic segments were placed in one  
133 well of a 6-well plate; and allowed to adhere for a minute. The tissues was covered just  
134 enough with DMEM/F12 media containing 5 % FBS and plasmocin. Care was taken not to  
135 move the tissues. The cells sprouting by day 10 were cultured and propagated using the same  
136 medium. Cells were used for assays after passage 3. The smooth muscle phenotype of the cells  
137 was confirmed using western blot analysis for Calponin, a specific smooth muscle cell marker.  
138

139 *5-ethynyl-2'-deoxyuridine (EdU) -Cell Proliferation assay:* The rationale for using Human colonic  
140 smooth muscle cells is to know any impact on cells expressing low or no α-1 adrenergic  
141 receptors (Catalogue number, CSC-7803W, Creative Bioarray, NY, USA). The cells were  
142 seeded onto a 96-well plate at a density of  $5 \times 10^3$  cells per well. The cells were allowed to  
143 attach overnight. Cells were treated with nanoparticles (NP) at a concentration of 1:1000 -  
144 1:100 dilution (NP suspension:Media). Water soluble tetrazolium salt (WST-1) assay was  
145 performed as per manufacturer's instruction (Sigma Aldrich, USA). In brief, 10 µl of WST-1  
146 solution was added per well and the plates were incubated at 37 °C under an atmosphere of 5  
147 % CO<sub>2</sub> in room air for 90 minutes. The resulting change in absorbance was read using a  
148 spectrophotometer (SpectraMax plus, Molecular devices, CA, USA) at a wavelength of 490 nm.  
149 EdU incorporation assay was performed as per manufacturer's instruction (Invitrogen,  
150 Carlsbad, CA, USA). In brief, cells were incubated with different dilutions of PNE NP in  
151 optiMEM media supplemented with 10 µM EdU for 24 h. Cells were then washed in isotonic  
152 Phosphate Buffered Saline pH 7.4 and fixed using 3.7 % formaldehyde. Cells were then  
153 permeabilized using 0.5 % Triton X-100 in PBS and stained for EdU using components  
154 provided in the kit. The cells were then visualized for Hoechst (under DAPI filter; blue  
155 fluorescence) and EdU (under GFP filter; green fluorescence) using Fluorescence microscopy  
156 (Nikon Eclipse Ti-U). The percentage of EdU-positive cells (green fluorescence -  
157 representative of replication) was calculated via image analysis using the software ImageJ  
158 (v1.46).  
159

160 *Measurement of norepinephrine and PNE-NP-stimulated calcium signalling in cultured vascular smooth*  
161 *muscle cells:* Measurements of phenylephrine and PNE-NP-stimulated calcium signaling in  
162 cultured vascular smooth muscle cells were done essentially as described previously using  
163 cultured human kidney-derived HEK cells.<sup>[6]</sup> In brief, primary cultures of mouse aorta-derived  
164 were grown to approximately 80 % confluency in DMEM/F12 media in 25 cm<sup>2</sup> T25 flasks.  
165 Cells were detached in enzyme-free isotonic phosphate-buffered saline supplemented with  
166 10 mM EDTA 10 mM and were then re-suspended in EDTA-free Hanks buffered isotonic  
167 saline pH 7.4 containing 1 mM Calcium and / or 1 mM magnesium chloride. Vascular smooth  
168 muscle Cells from a single T75 flask were harvested by centrifugation (1000 rpm - for  
169 5minutes at room temperature) in 15 ml centrifuge tubes and re-suspended in 1 ml of Fluo-4-

170 AM 'no-wash' calcium indicator dye (Thermo Fisher Scientific, USA.). Calcium indicator dye  
171 uptake was allowed to proceed with shaking for 40 min at RT. Fluorescence measurements  
172 reflecting the elevation of intracellular calcium were conducted using a PerkinElmer  
173 Fluorescence spectrometer (PerkinElmer instrument, Shelton, CT, USA) with an excitation  
174 wavelength of 480 nm and emission of 530 nm. Cells ( $4 \times 10^5$ ) were maintained in suspension  
175 in a stirred plastic cuvette and PNE-NPs ( $125 \mu\text{l ml}^{-1}$  corresponding to  $9.18 \times 10^8$  NPs  $\text{ml}^{-1}$ ) or  
176 norepinephrine ( $5 \mu\text{M}$ ) were added to assess agonist-induced changes in fluorescence. As for  
177 the intact tissue bioassay, to assess the action of receptor-selective alpha-1-adrenoceptor  
178 antagonists on agonist-stimulated calcium signaling, prazosin, CGP12177A or BMY7378 were  
179 added to the cell suspensions 10 minutes prior to the addition of either norepinephrine or the  
180 PNE-NPs.

181  
182 *Confocal fluorescence imaging to visualize PNE-NPs internalization in vascular smooth muscle cells:*  
183 Isolated VSMC's were grown to 80 % confluence in T25 flasks in 25 mm glucose DMEM/10 %  
184 fetal bovine serum. Cells were lifted using isotonic 1mM EDTA-containing phosphate buffer  
185 saline lacking calcium and magnesium (PBS) and finally re-plated in 35 mm glass bottom cell  
186 culture dishes (MatTek Corporation, Ashland MA USA) in a volume of DMEM high glucose  
187 with 5 % fetal bovine serum. After 2 days,  $125 \mu\text{l ml}^{-1}$  volume of PNE-NPs were added to the  
188 cell monolayers in a total volume of 1ml either without or with the prior addition of  $300 \mu\text{M}$   
189 CGP12177A for 10 minutes. After 10 minutes of incubation with the PNE-NPs, the cell  
190 monolayers were washed 3 times with 1 ml isotonic PBS then fixed with 1 ml of 10 %  
191 formalin for 10 minutes. The fixed cells were washed with PBS for 5 times and were then  
192 visualized using confocal fluorescence microscopy to monitor NP internalization. Images  
193 were collected on a Zeiss LSM-510 Meta inverted microscope using either a  $40\times$  water  
194 immersion or a  $63\times$  oil 1.4NA oil immersion lens. The PNE-NP particle fluorescence (Figure 4)  
195 was visualized using a 515/50 nm band-pass filter upon excitation with an argon laser at 488  
196 nm. Image acquisition was performed with identical gain, contrast, laser excitation, pinhole  
197 aperture, and laser scanning speed for all images shown in the figures wherein scale bars are  
198 included.

199  
200 *Western blot detection of agonist-activation of MAPKinase in primary cultures of aorta-derived smooth*  
201 *muscle cells:* The aorta-derived smooth muscle cells were grown to 80 % confluency using  
202 smooth muscle cell growth medium (DMEM low glucose media with 5 % FBS and antibiotics  
203 penicillin and streptomycin  $1 \text{ U ml}^{-1}$ ) in 24-multiwell plates of 15.6 mm diameter/well.  
204 Monolayers were then treated for 5minutes with norepinephrine  $1 \mu\text{M}$  or PNE-NPs of  
205 increasing volume ( $10\text{-}25 \mu\text{l}$ ; Concentration =  $7.34 \times 10^6 \mu\text{l}^{-1}$ ) added to a total volume of 1 ml.  
206 At 5 min after agonist addition, the medium was aspirated followed by the addition of ice-cold  
207 lysis buffer and then lysed and homogenized using 1 mL of ice-cold proteinase-inhibitor-  
208 containing NP40-supplemented lysis buffer with the following composition: 20 mm Tris-HCl,  
209 pH 7.5, 100 mm NaCl, 10 mm  $\text{MgCl}_2$ , 1 mm EDTA, 1 mm EGTA 0.5% NP40, 2.5 mm sodium  
210 pyrophosphate, 1 mm b-glycerophosphate, 1 mm  $\text{Na}_3\text{VO}_4$ , 25 mm NaF, 1 mg  $\text{ml}^{-1}$  leupeptin,  
211 1 mg  $\text{ml}^{-1}$  aprotinin, 1 mM phenylmethylsulfonyl fluoride, and 1 mm dithiothreitol. To 1 ml of  
212 lysis buffer 10  $\mu\text{l}$  of proteinase inhibitor cocktail was also added (calbiochem cocktail set III,  
213 EDTA-free cat. no. 539134). Equivalent amounts of protein (measured by precision red  
214 reagent, Cytoskeleton, Inc.) from each cell monolayer extract were heat-denatured at  $92^\circ\text{C}$   
215 for 6 min in denaturing Laemmli buffer and resolved on 4–20 % gradient Novex Tris-Glycine  
216 gels (ThermoFisher) run at 120 V for 2 h. Transfer of proteins onto PVDF membrane was  
217 done using a semi-dry method as described elsewhere.<sup>[7]</sup> The resolved proteins were  
218 transferred to PVDF membrane, blocked for 1 h at RT in PBST buffer [Phosphate-buffered  
219 isotonic saline supplemented with 0.1 % (v/v) Tween-20] containing 1% ECL Advance  
220 Blocking Agent (GE Healthcare, Waukesha, WI). The abundance of both phospho-MAPK and  
221 total-MAPK were quantified using appropriate antibodies (Cat # 9106L and 4695S, Cell  
222 signaling technologies) conditions for primary antibodies as described previously.<sup>[7]</sup> Upon  
223 incubation with respective secondary antibodies for 1 h. the membranes were washed for 5  
224 min 3 times using PBST. After washing the membrane with PBST, the peroxidase activity was

225 detected with the chemi-luminescence reagent ECL-Advance (GE Healthcare, Waukesha, WI)  
226 on a Biorad reader. Band intensities representing p-MAPK/total-MAPK were quantified using  
227 the Image J quantification software and normalized to beta-actin. The experiments were  
228 repeated a minimum of 3-times and the signals for phospho-MAPKinase was normalized to  
229 the signal for total MAPKinase detected in the blot.

230

231 *Statistical Analysis:* The data and statistical analysis were performed using GraphPad Prism software.  
232 The mean log concentration–response curves to agonists were analyzed by fitting data to a  
233 four-parameter logistic equation using non-linear regression (pEC50 log(agonist) vs response  
234 – variable slope (four parameters)) (GraphPad Prism). Error bars smaller than the symbols  
235 shown in the figures are not visible. Statistical comparisons between data points were made  
236 using either Student's unpaired t-test when comparing two groups or a one-way ANOVA, with  
237 Tukey's multiple comparison test when comparing multiple groups. In all cases, a significant  
238 difference was considered at  $P < 0.05$ .

239

#### 240 References

- 241 [1] V. Ozhukil Kollath, M. Derakhshandeh, F. D. Mayer, T. Mudigonda, M. N. Islam, M. Trifkovic, K.  
242 Karan, RSC Adv. 2018, 8, 31967.
- 243 [2] D. Pan, J. Zhang, Z. Li, C. Wu, X. Yan, M. Wu, Chem. Commun. 2010, 46, 3681.
- 244 [3] V. K. Pulakazhi Venu, M. Saifeddine, K. Mihara, M. El-Daly, D. Belke, J. L. E. Dean, E. R. O'Brien,  
245 S. A. Hirota, M. D. Hollenberg, Br. J. Pharmacol. 2018, 175, 2063.
- 246 [4] M. El-Daly, V. K. Pulakazhi Venu, M. Saifeddine, K. Mihara, S. Kang, P. W. M. Fedak, L. A. Alston,  
247 S. A. Hirota, H. Ding, C. R. Triggle, M. D. Hollenberg, Vascul. Pharmacol. 2018, 109, 56.
- 248 [5] V. K. P. Venu, P. Uboldi, A. Dhyani, A. Patrini, R. Baetta, N. Ferri, A. Corsini, A. F. Muro, A. L.  
249 Catapano, G. D. Norata, Thromb. Haemost. 2015, 114, 186.
- 250 [6] A. Kawabata, M. Saifeddine, B. Al-Ani, L. Leblond, M. D. Hollenberg, J. Pharmacol. Exp. Ther.  
251 1999, 288, 358.
- 252 [7] K. Mihara, R. Ramachandran, B. Renaux, M. Saifeddine, M. D. Hollenberg, J. Biol. Chem. 2013,  
253 288, 32979.
